# Supplementary material
Source: PubMed Central journal article supplement (PMC2886730)
Supplement: NIHMS116230-supplement-1_si_001.pdf [file NIHMS116230-supplement-1_si_001.pdf]

## Supporting Information

(Total 1 page)

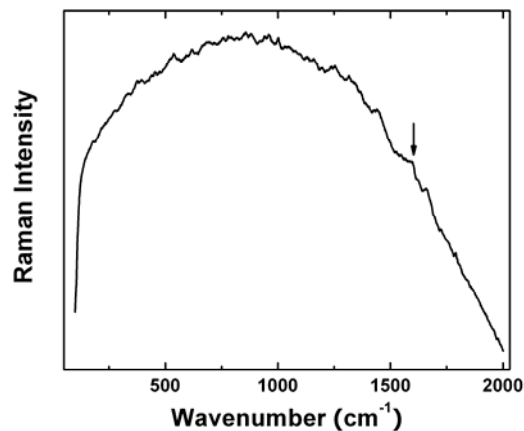

**Figure S1.** Raman spectrum of the liver sample harvested from the PEG-SWNT-administrated mice 8 weeks post-exposure.

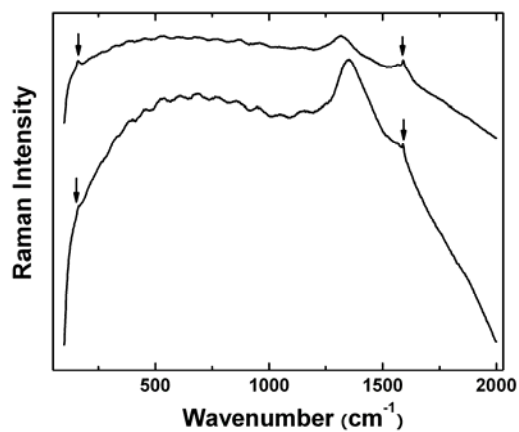

**Figure S2.** Raman spectra of the simulated samples incubated separately in 5%  $\text{H}_2\text{O}_2$  (pH 7.0, top) or citrate buffer (pH 4.4, bottom).
